# Supplementary material for: Does intravenous patient-controlled analgesia or continuous block prevent rebound pain following infraclavicular brachial plexus block after distal radius fracture fixation? A prospective randomized controlled trial
Source: PubMed Central journal article supplement — Korean J Anesthesiol. 2023 Apr 24;76(6):559–66. doi: 10.4097/kja.23076 (PMC10718626; doi:10.4097/kja.23076), 2023-04-24
Supplement: kja-23076-Supplementary-Table-1.pdf [file kja-23076-Supplementary-Table-1.pdf]

Supplementary Table 1. Visual analogue scale scores for postoperative pain

| Postoperative time point | BPB only group (n = 22) | IV PCA group (n = 22)   | Continuous block group (n = 20) | p value |
|--------------------------|-------------------------|-------------------------|---------------------------------|---------|
| 4 hours                  | 0 (0, 0)                | 0 (0, 0)                | 0 (0, 0)                        | 0.991   |
| 6 hours                  | 0 (0, 0)                | 0 (0, 0)                | 0 (0, 0)                        | 0.710   |
| 9 hours                  | 2 (1, 3)                | 0 (0, 1.8) <sup>†</sup> | 0 (0, 0.5) <sup>‡</sup>         | 0.003*  |
| 12 hours                 | 3 (3, 4)                | 3 (2, 4.8)              | 0.5 (0, 3) <sup>‡</sup>         | 0.009*  |
| 24 hours                 | 3 (3, 3)                | 3 (2, 3)                | 3 (3, 3)                        | 0.664   |
| 48 hours                 | 2 (2, 3)                | 3 (2, 3)                | 2.5 (2, 3)                      | 0.678   |
| 2 weeks                  | 1.5 (1, 3)              | 2 (1, 3)                | 2 (1, 3)                        | 0.688   |

Values are presented as median (Q1, Q3).

\*p value < 0.05 is considered significant.

<sup>†</sup> p value < 0.017 in post-hoc analysis between BPB only group and IV PCA group.

<sup>‡</sup> p value < 0.017 in post-hoc analysis between BPB only group and continuous block group.

§ Continuous values are presented as median, with the width of the interquartile range in parentheses and the range in square brackets.

BPB, brachial plexus block; IV PCA, intravenous patient-controlled analgesia
