# Supplementary material for: Does intravenous patient-controlled analgesia or continuous block prevent rebound pain following infraclavicular brachial plexus block after distal radius fracture fixation? A prospective randomized controlled trial
Source: PubMed Central journal article supplement — Korean J Anesthesiol. 2023 Apr 24;76(6):559–66. doi: 10.4097/kja.23076 (PMC10718626; doi:10.4097/kja.23076), 2023-04-24
Supplement: kja-23076-Supplementary-Table-2.pdf [file kja-23076-Supplementary-Table-2.pdf]

Supplementary Table 2. Median opioid equivalent consumption (OEC) in the 2-week postoperative period

| Postoperative period | BPB only group (n = 22) | IV PCA group (n = 22)** | Continuous block group (n = 20) | p value |
|----------------------|-------------------------|-------------------------|---------------------------------|---------|
| 0–4 hours            | 0 (0, 0)                | 0 (0, 0)                | 0 (0, 0)                        | 1.000   |
| 4–6 hours            | 0 (0, 0)                | 0 (0, 0)                | 0 (0, 0)                        | 0.385   |
| 6–9 hours            | 0 (0, 0)                | 0 (0, 0)                | 0 (0, 0)                        | 0.728   |
| 9–12 hours           | 7.5 (7.5, 13.1)         | 0 (0, 5.6) <sup>†</sup> | 0 (0, 1.9) <sup>‡</sup>         | 0.001*  |
| 12–24 hours          | 15 (7.5, 15)            | 7.5 (0, 7.5)            | 7.5 (5.6, 15)                   | 0.426   |
| 24–48 hours          | 0 (0, 7.5)              | 0 (0, 5.6)              | 0 (0, 9.4)                      | 0.572   |
| 48 hours to 2 weeks  | 0 (0, 28.1)             | 48.8 (16.9, 103.1)      | 11.3 (0, 39.4)                  | 0.004*  |

Values are presented as median (Q1, Q3).

\*p value < 0.05 is considered significant.

\*\*Opioids which is infused though IV PCA were not include in this analysis.

<sup>†</sup>p value < 0.017 in post-hoc analysis between BPB only group and IV PCA group.

<sup>‡</sup>p value < 0.017 in post-hoc analysis between BPB only group and continuous block group.

<sup>§</sup>Continuous values are presented as median, with the width of the interquartile range in parentheses and the range in square brackets. All values are described by the milligram (mg).

BPB, brachial plexus block; IV PCA, intravenous patient-controlled analgesia.
